# Supplementary material for: Checkpoint inhibition of origin firing prevents inappropriate replication outside of S-phase
Source: eLife journal article supplement (doi:10.7554/elife.63589), 2021-01-05
Supplement: supp [file elife-63589-supp-v1.zip]

Archive with 7 entries (7 files):
- elife_poa_e63589_Figure_1_figure_supplement_1.pdf
- elife_poa_e63589_Figure_2_figure_supplement_1.pdf
- elife_poa_e63589_Figure_3_figure_supplement_1.pdf
- elife_poa_e63589_Figure_4_figure_supplement_1.pdf
- elife_poa_e63589_Figure_4_figure_supplement_2.pdf
- elife_poa_e63589_Figure_4_figure_supplement_3.pdf
- elife_poa_e63589_Transparent_Reporting_File.docx
