# Supplementary figures and images for: Checkpoint inhibition of origin firing prevents inappropriate replication outside of S-phase
Source: eLife journal article supplement (doi:10.7554/elife.63589), 2021-01-05

Figure 1 - Figure Supplement 1

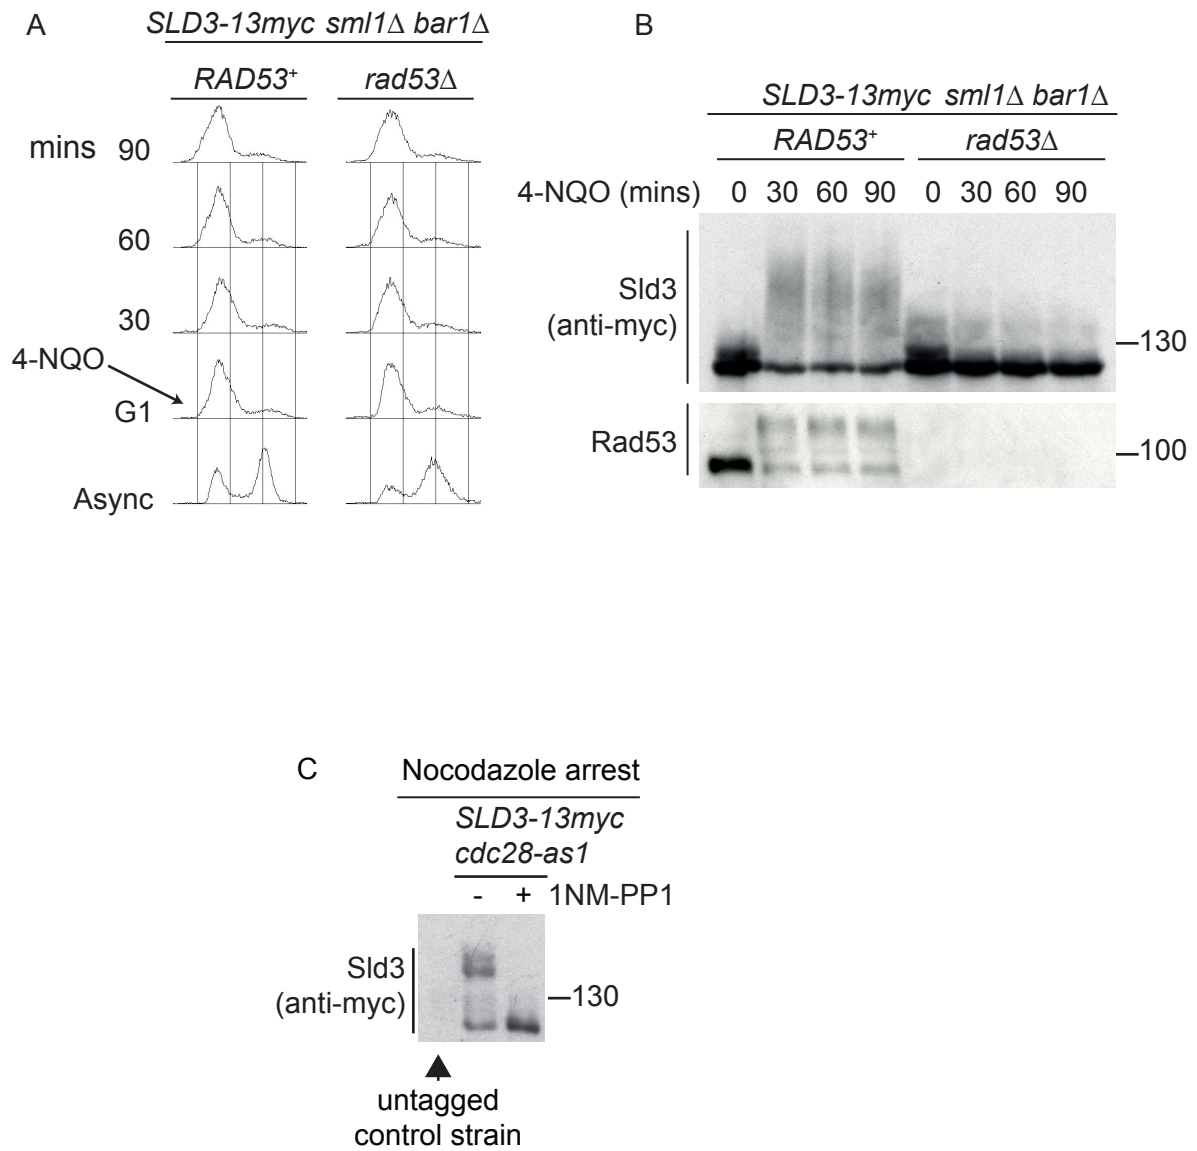

Supplement: supp [file elife-63589-supp-v1.zip › elife_poa_e63589_Figure_1_figure_supplement_1.pdf]

Figure 2 - Figure Supplement 1

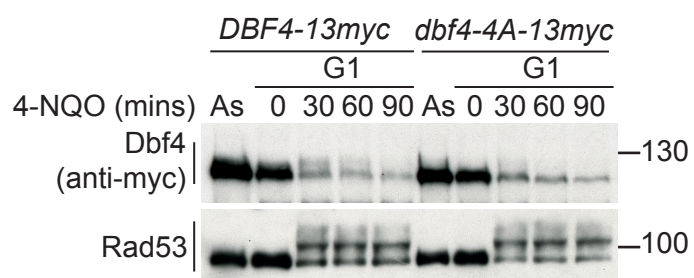

Supplement: supp [file elife-63589-supp-v1.zip › elife_poa_e63589_Figure_2_figure_supplement_1.pdf]

Figure 3 - Figure Supplement 1

A

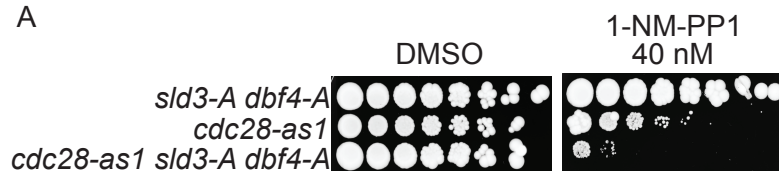

B

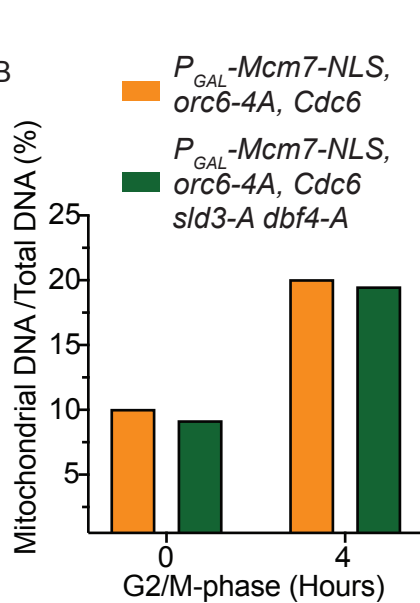

C

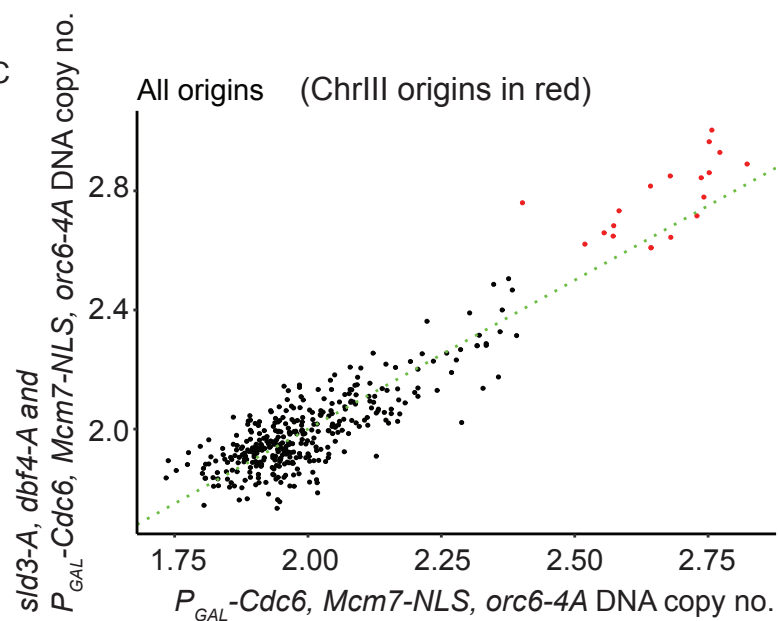

D

Chr III (RRIGA transgene replaces endogenous LEU2 gene)

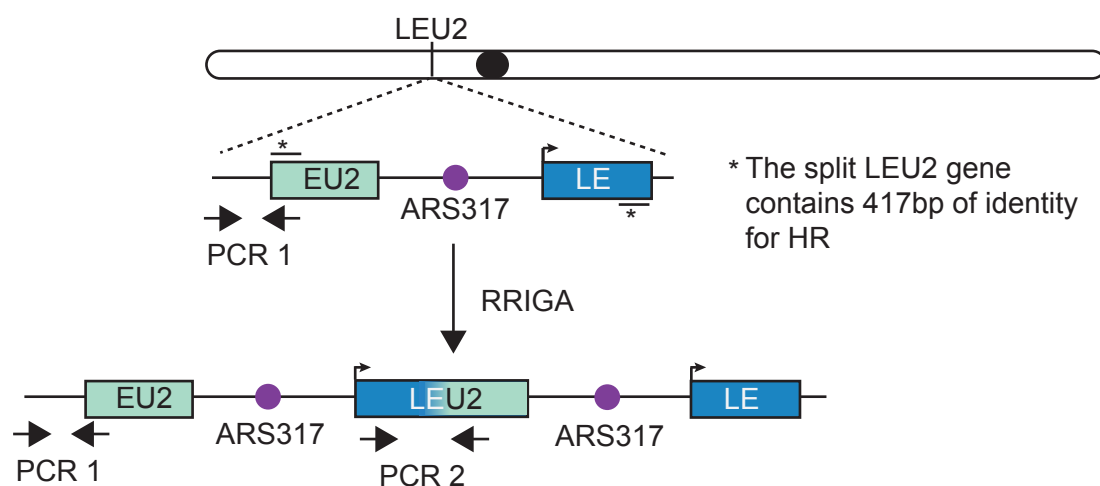

E

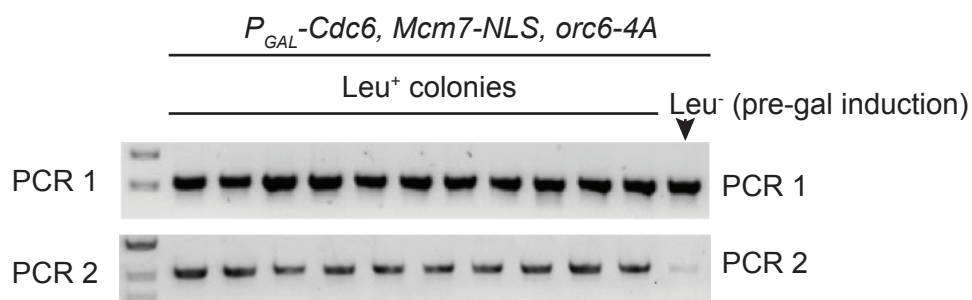

Supplement: supp [file elife-63589-supp-v1.zip › elife_poa_e63589_Figure_3_figure_supplement_1.pdf]

Figure 4 - Figure Supplement 1

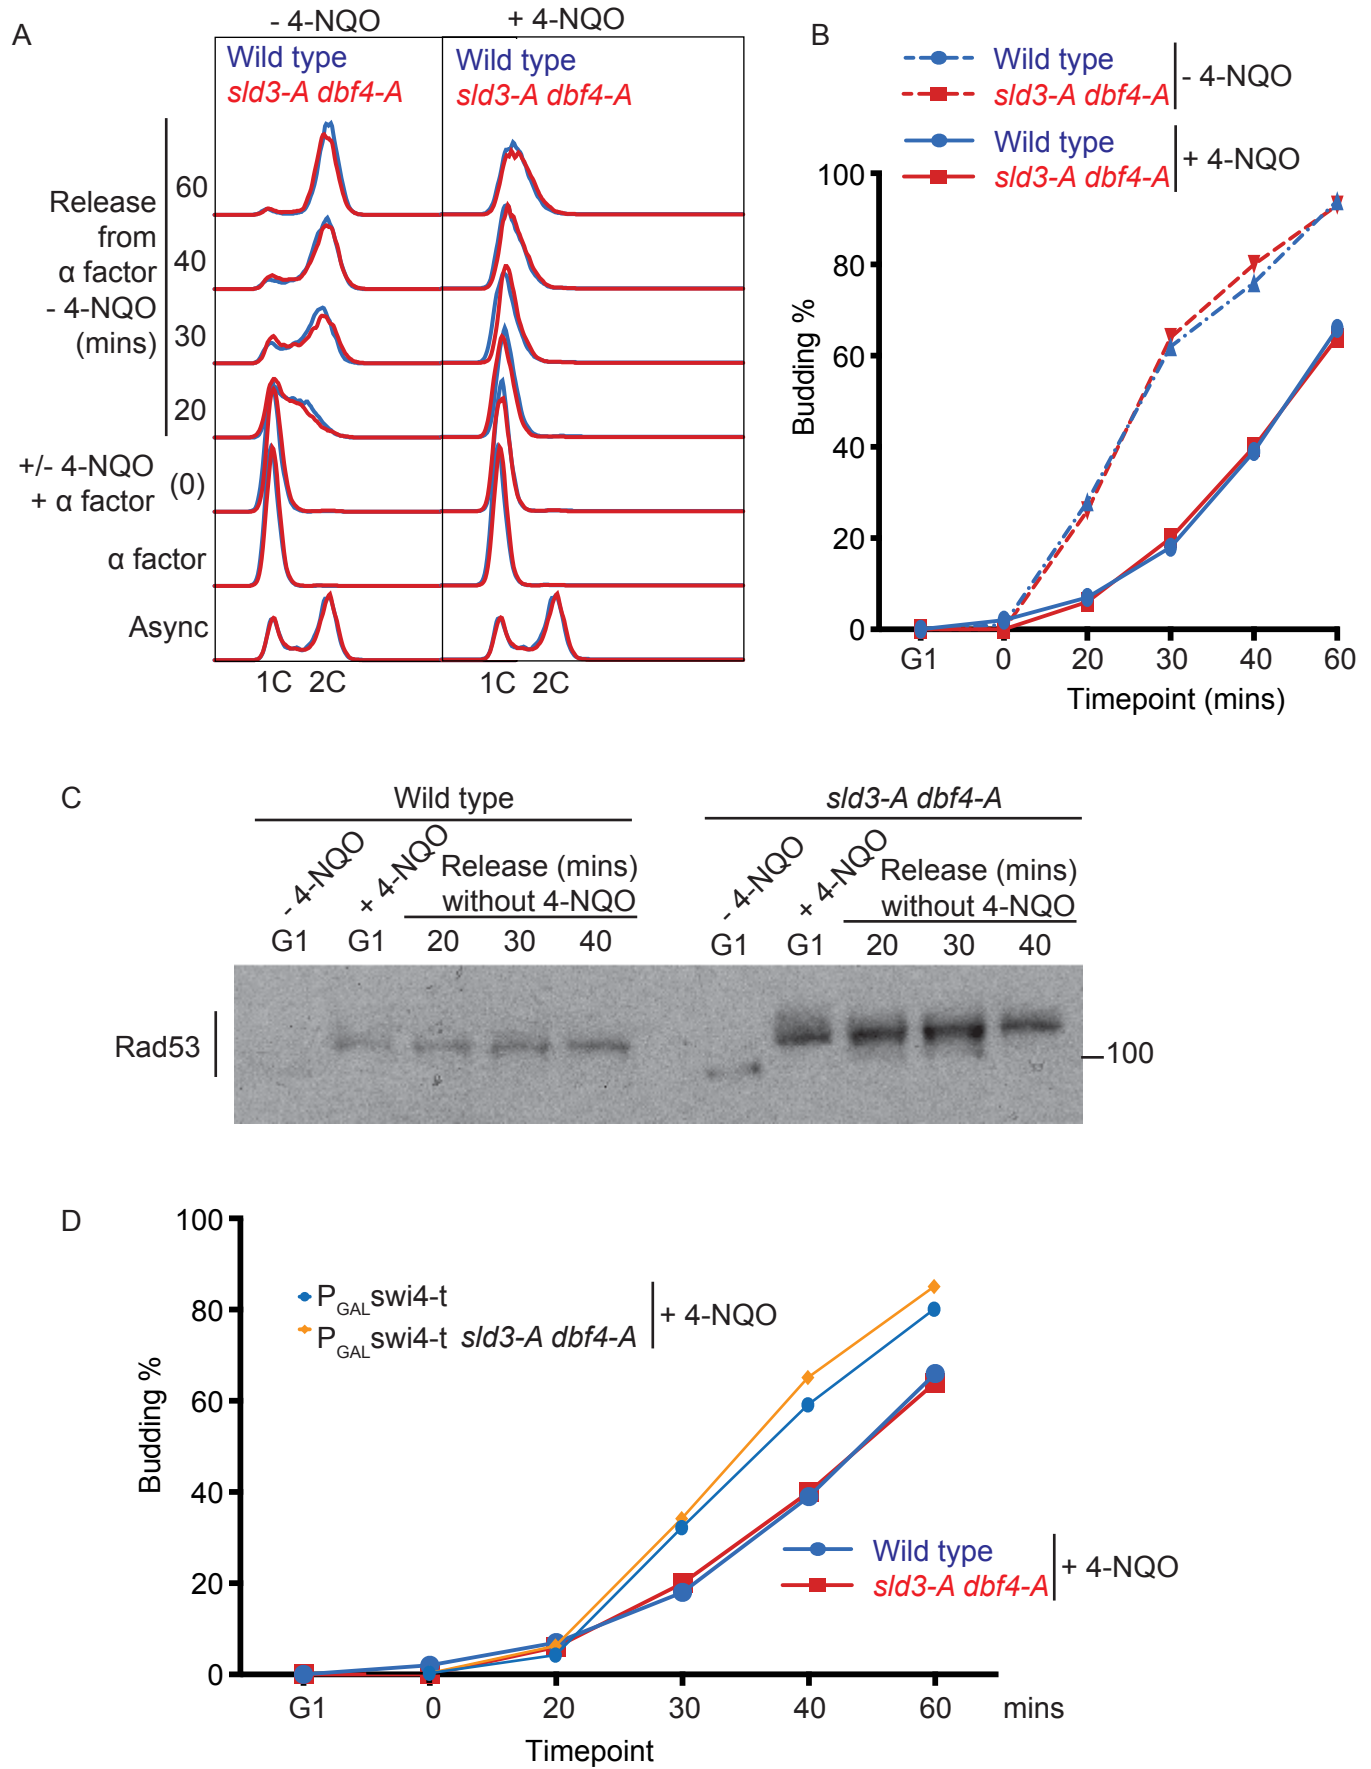

Supplement: supp [file elife-63589-supp-v1.zip › elife_poa_e63589_Figure_4_figure_supplement_1.pdf]

Figure 4 - Figure Supplement 2

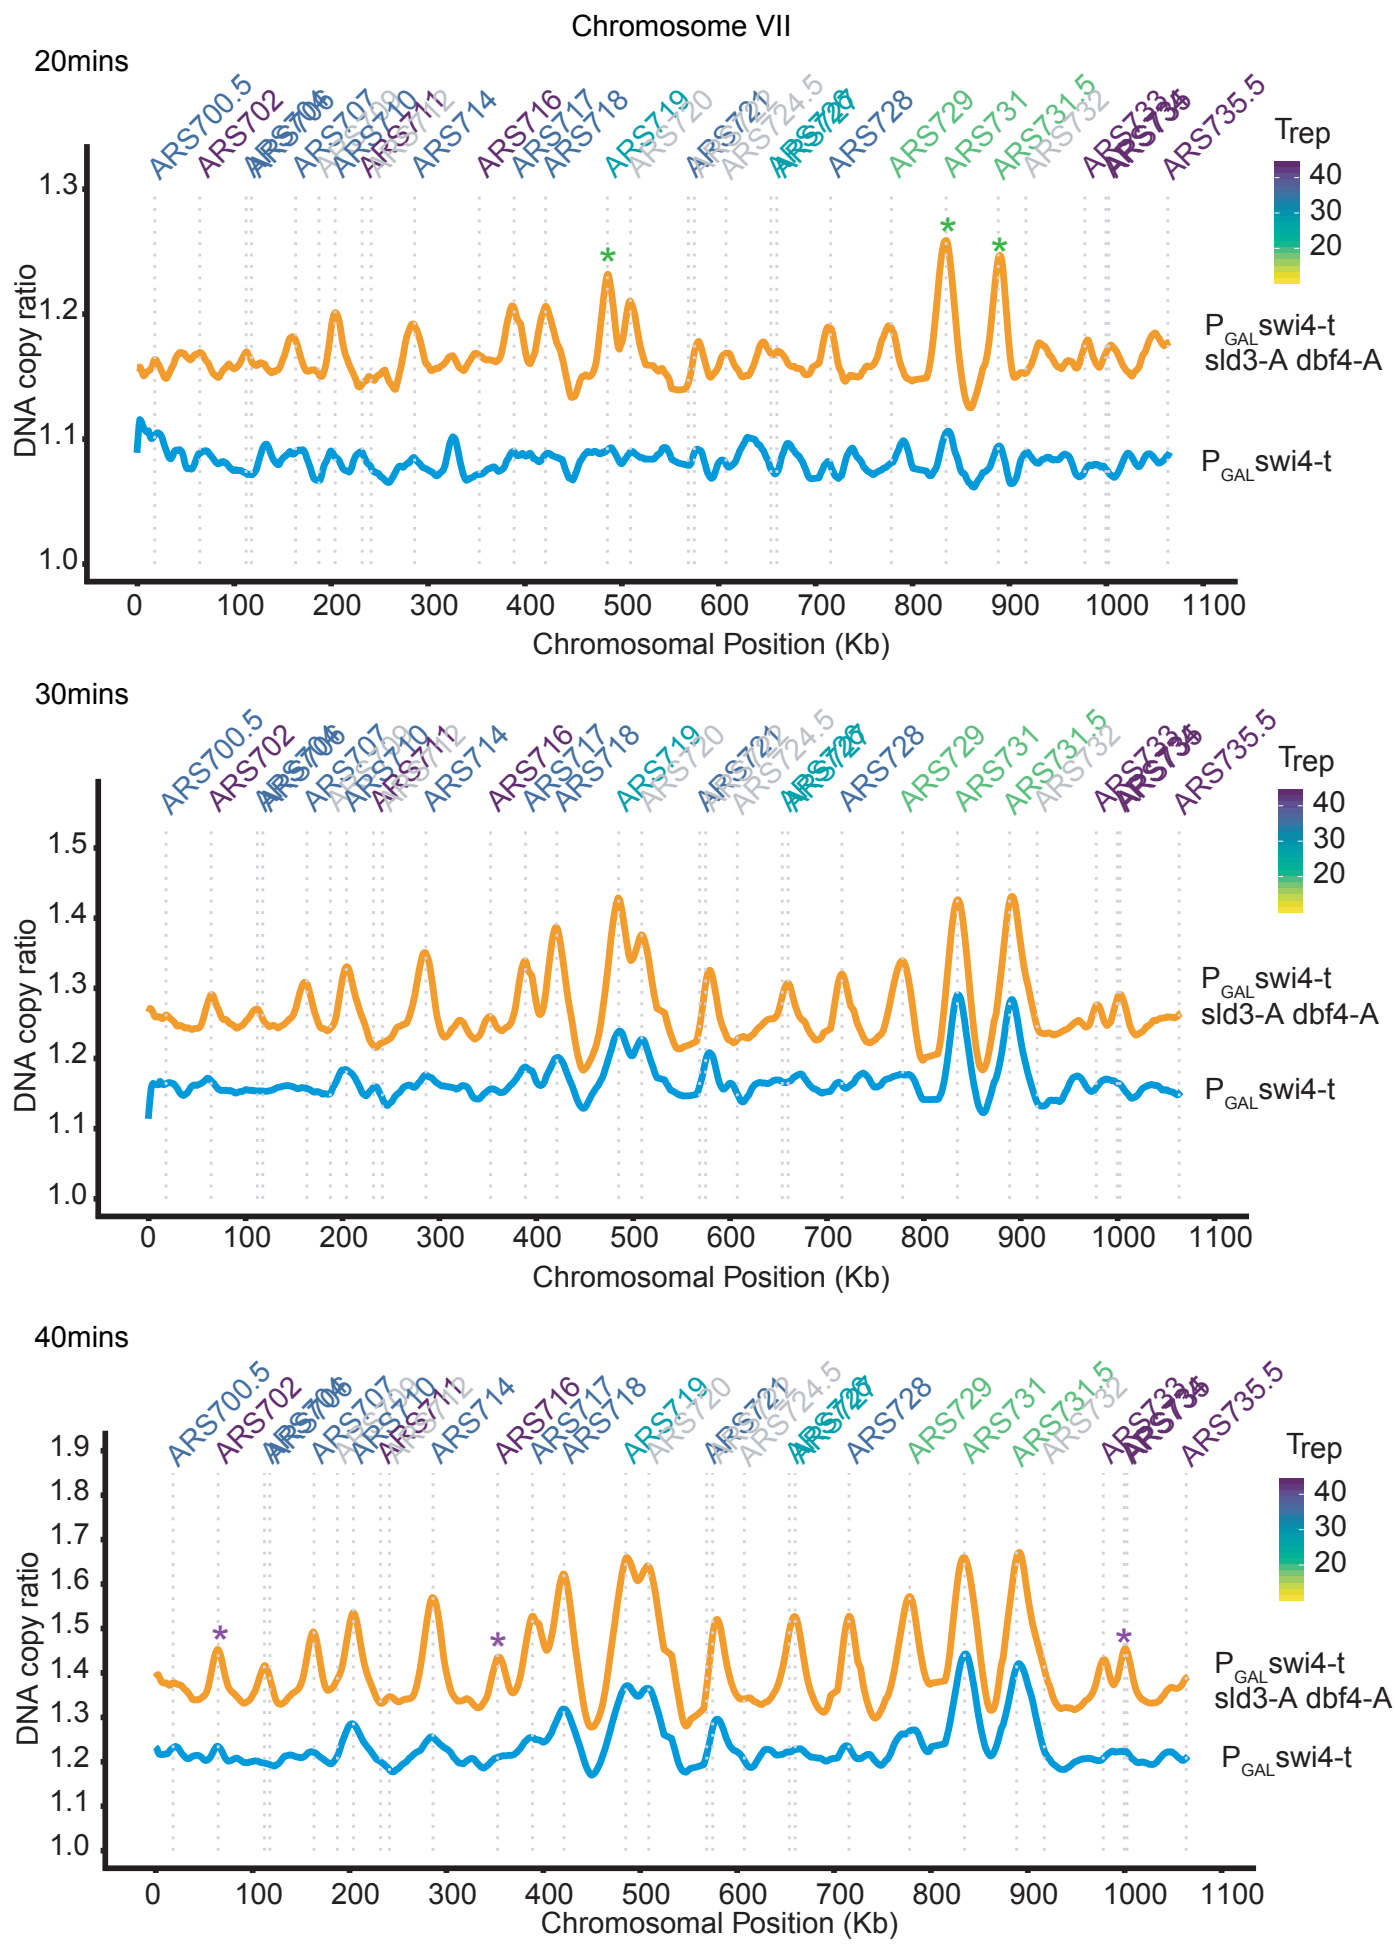

Supplement: supp [file elife-63589-supp-v1.zip › elife_poa_e63589_Figure_4_figure_supplement_2.pdf]

Figure 4 - Figure Supplement 3

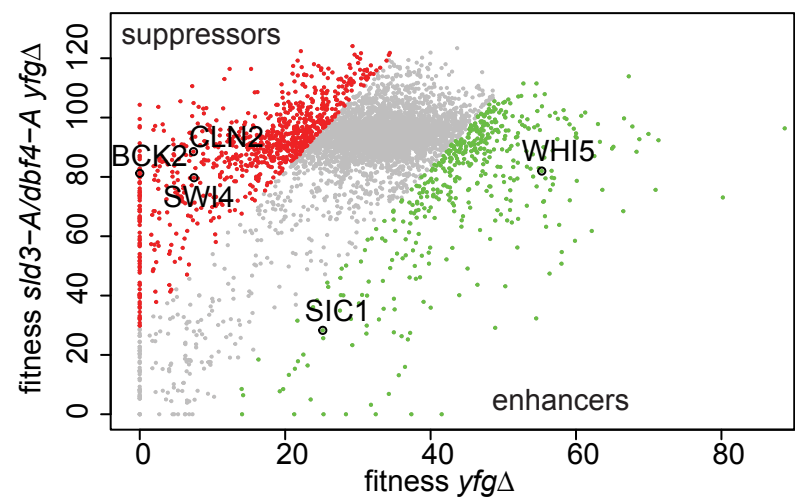

Supplement: supp [file elife-63589-supp-v1.zip › elife_poa_e63589_Figure_4_figure_supplement_3.pdf]
